# Supplementary material for: linc2function: A deep learning model to identify and assign function to long noncoding RNA (lncRNA)
Source: bioRxiv or medRxiv preprint supplement (doi:10.1101/2021.01.29.428785), 2021-01-31
Supplement: Supplementary file [file media-1.pdf]

576 **A Appendix**

Table A1. Classification Report for Human Specific Light Weight Model)

| -            | Precision | Recall | F1-Score |
|--------------|-----------|--------|----------|
| Coding       | 0.92      | 0.88   | 0.90     |
| Noncoding    | 0.88      | 0.91   | 0.89     |
| accuracy     |           |        | 0.90     |
| macro avg    | 0.90      | 0.90   | 0.90     |
| weighted avg | 0.90      | 0.90   | 0.90     |

Table A2. Confusion Matrix for Human Specific Light Weight Model)

| -        | Positive | Negative |
|----------|----------|----------|
| Positive | 885      | 117      |
| Negative | 81       | 819      |

Positive class: lncRNA,  
Negative class: other RNA

Table A3. Classification Report for Human Specific Full Model)

| -            | Precision | Recall | F1-Score |
|--------------|-----------|--------|----------|
| Coding       | 0.92      | 0.89   | 0.90     |
| Noncoding    | 0.88      | 0.91   | 0.90     |
| accuracy     |           |        | 0.90     |
| macro avg    | 0.90      | 0.90   | 0.90     |
| weighted avg | 0.90      | 0.90   | 0.90     |

Table A4. Confusion Matrix for Human Specific Full Model)

| -        | Positive | Negative |
|----------|----------|----------|
| Positive | 890      | 112      |
| Negative | 77       | 823      |

Positive class: lncRNA,  
Negative class: other RNA

Table A5. Classification Report for Species Agnostic Light Weight Model)

| -            | Precision | Recall | F1-Score |
|--------------|-----------|--------|----------|
| Coding       | 0.91      | 0.89   | 0.90     |
| Noncoding    | 0.88      | 0.91   | 0.89     |
| accuracy     |           |        | 0.89     |
| macro avg    | 0.89      | 0.90   | 0.89     |
| weighted avg | 0.90      | 0.89   | 0.89     |

Table A6. Confusion Matrix for Species Agnostic Light Weight Model)

| -        | Positive | Negative |
|----------|----------|----------|
| Positive | 887      | 115      |
| Negative | 85       | 815      |

Positive class: lncRNA,  
Negative class: other RNA

Table A7. Classification Report for Species Agnostic Full Model)

| -            | Precision | Recall | F1-Score |
|--------------|-----------|--------|----------|
| Coding       | 0.91      | 0.88   | 0.89     |
| Noncoding    | 0.87      | 0.90   | 0.89     |
| accuracy     |           |        | 0.89     |
| macro avg    | 0.89      | 0.89   | 0.89     |
| weighted avg | 0.90      | 0.89   | 0.89     |

Table A8. Confusion Matrix for Species Agnostic Full Model)

| -        | Positive | Negative |
|----------|----------|----------|
| Positive | 887      | 115      |
| Negative | 85       | 815      |

Positive class: lncRNA,  
Negative class: other RNA

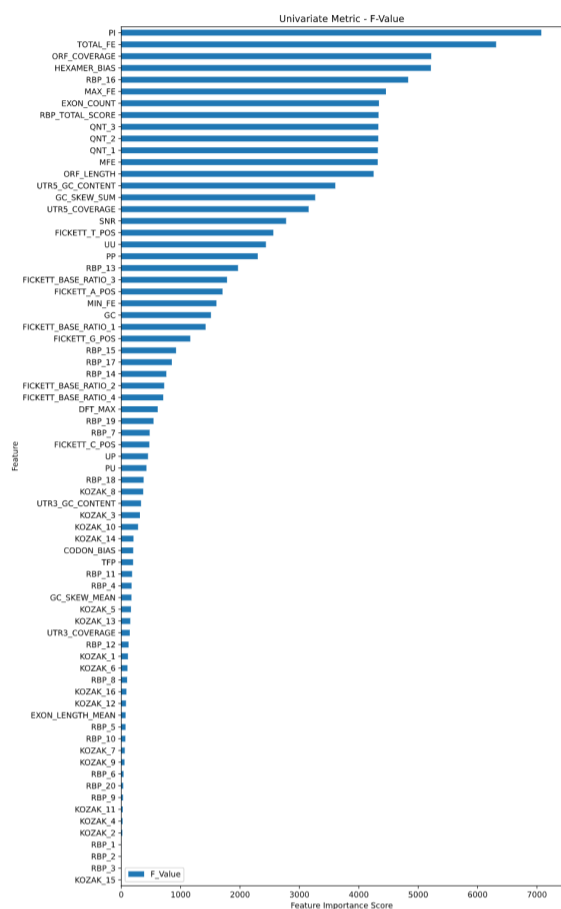

Fig. A1. Feature importance measures using F-Value.

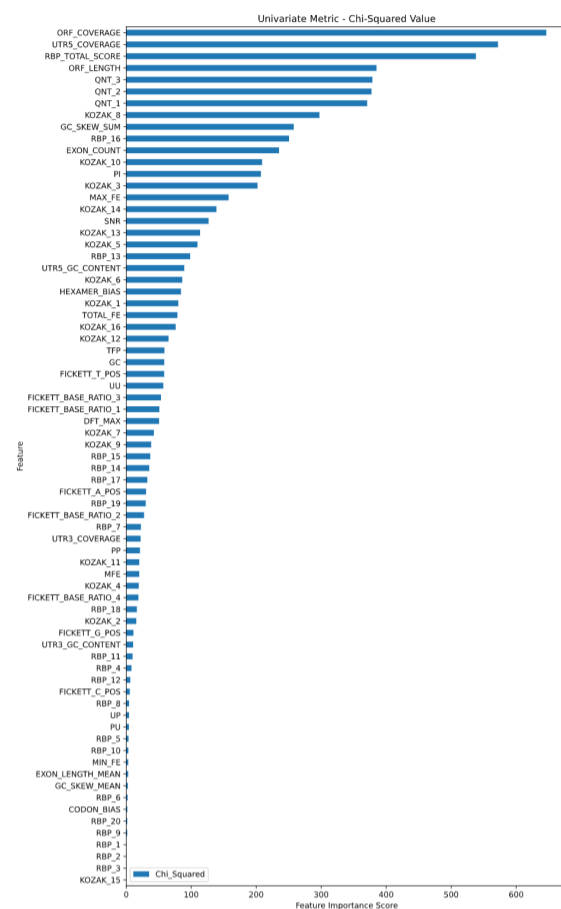

Fig. A2. Feature importance measures using Chi-Squared.

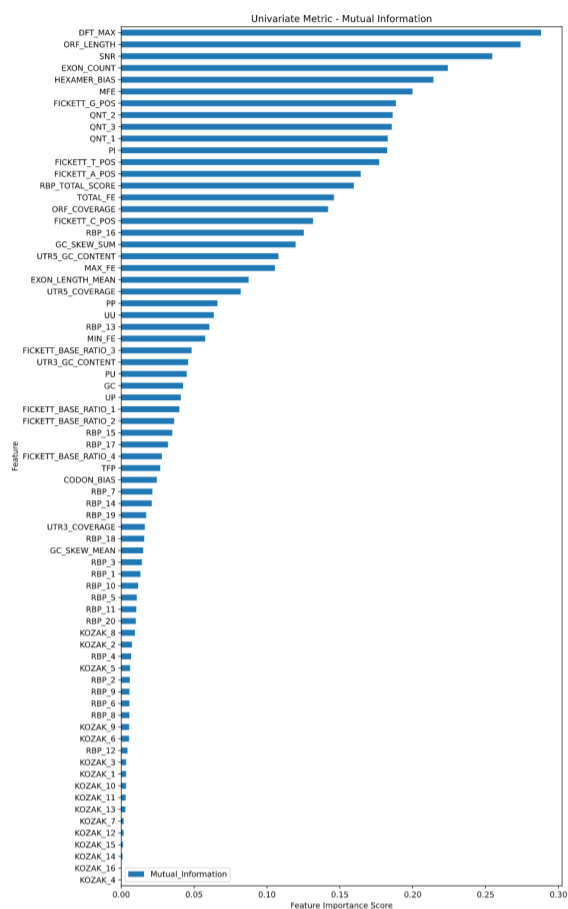

Fig. A3. Feature importance measures using Mutual Information.

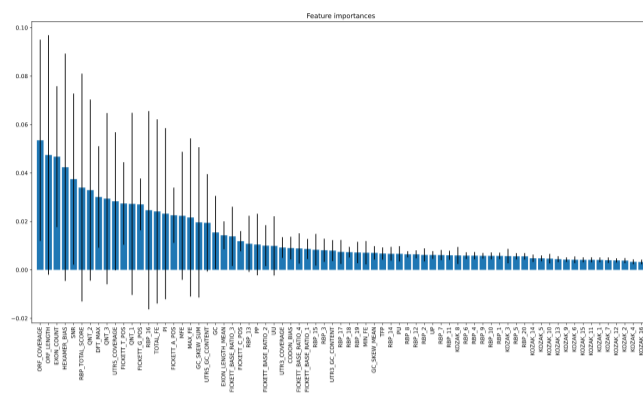

Fig. A4. Feature importance measures using tree based models.
